# Supplementary material for: Peculiar properties of homoleptic Cu complexes with dipyrromethene derivatives
Source: Royal Society of Chemistry journal article supplement (doi:10.1039/c3dt51541a), 2013-01-01
Supplement: c3dt51541a.pdf [file c3dt51541a.pdf]

## Peculiar properties of homoleptic Cu complexes with dipyrromethene derivatives.

### Supplementary Information

#### Figures

#### Mass spectrometry

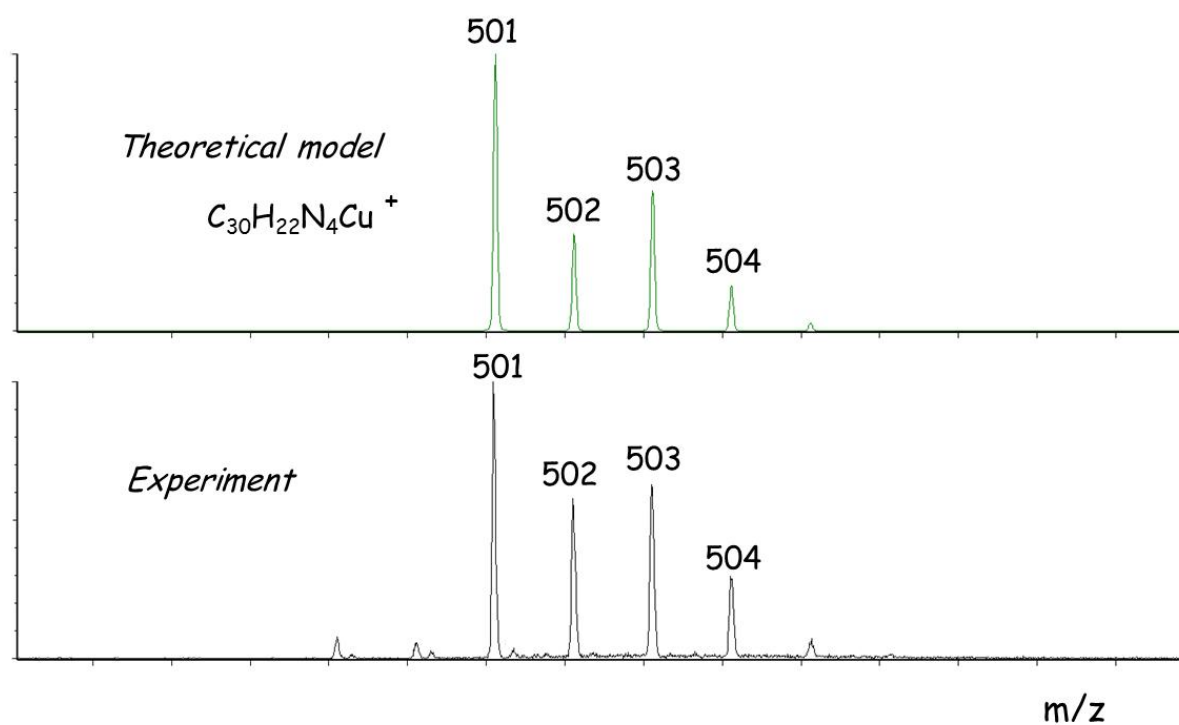

**Figure S1:** MALDI(+) mass spectrometry analysis of the  $[Cu(II)(dipy)_2]$  complex: comparison between the experimental data and the theoretical isotope model for the  $[Cu(II)(dipy)_2]^+$  cations.

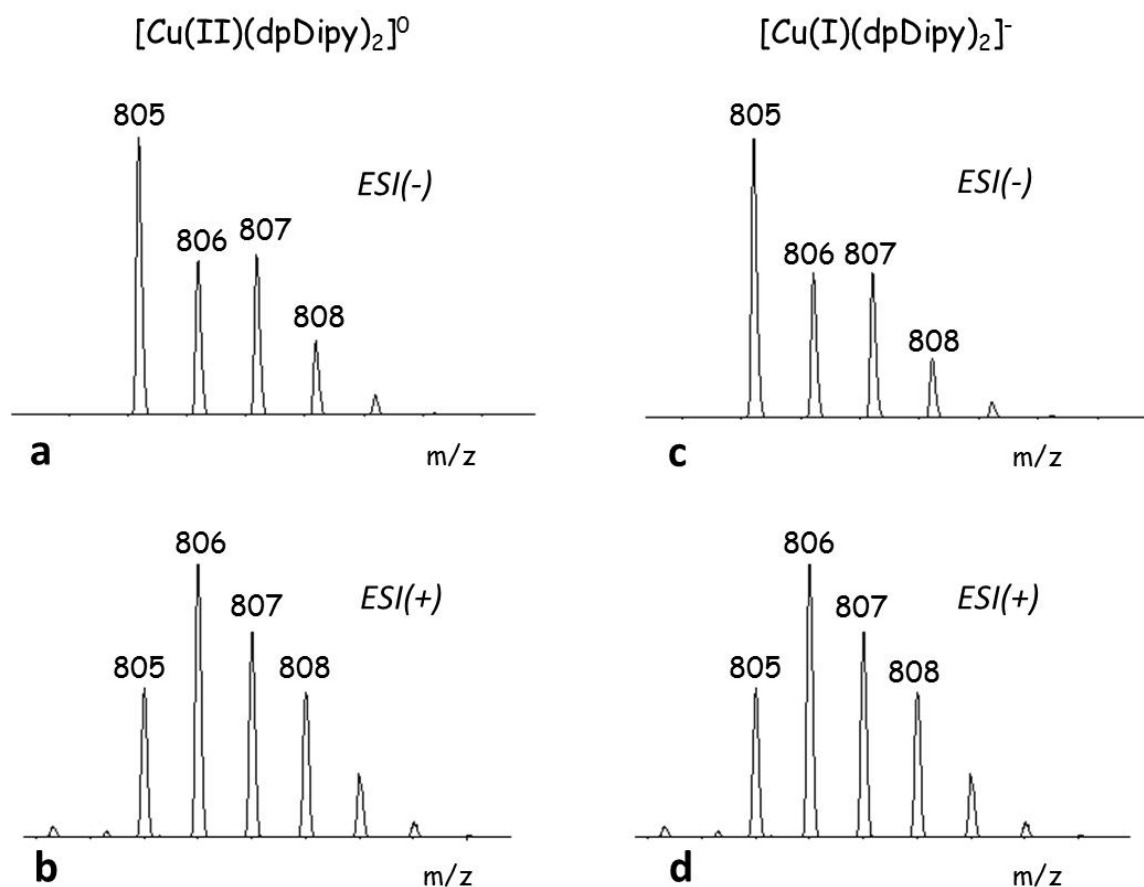

**Figure S2** : ESI mass spectrometry analyses of the Cu(II) and presumed Cu(I) complexes with dpDipy as ligand: **(a)** ESI(-) and **(b)** ESI(+) analyses of [Cu(II)(dpdipy)<sub>2</sub>] and **(c)** ESI(-) and **(d)** ESI(+) analyses of the crude presumed [Cu(I)(dpdipy)<sub>2</sub>].

## XR structures

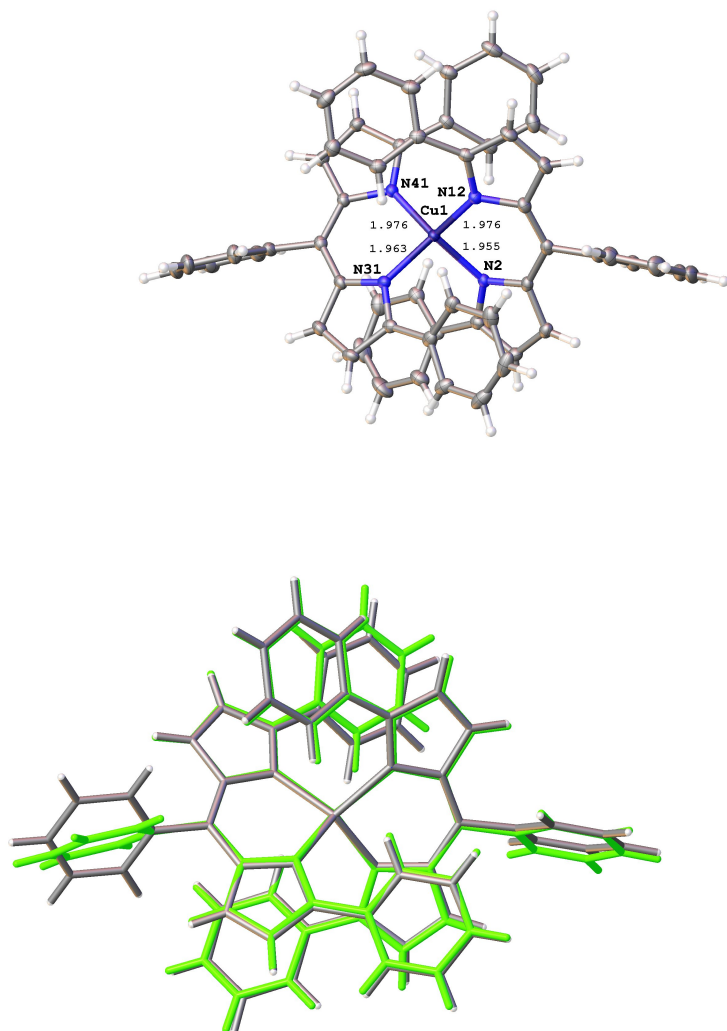

**Figure S3:** XR structure of the big crystals obtained for the last trial of synthesis of [Cu(I)(dpDipy)<sub>2</sub>]<sup>-</sup> (above) and for the superposition of this latter (in green) to [Cu(II)(dpDipy)<sub>2</sub>] (below) for comparison.

## EPR data

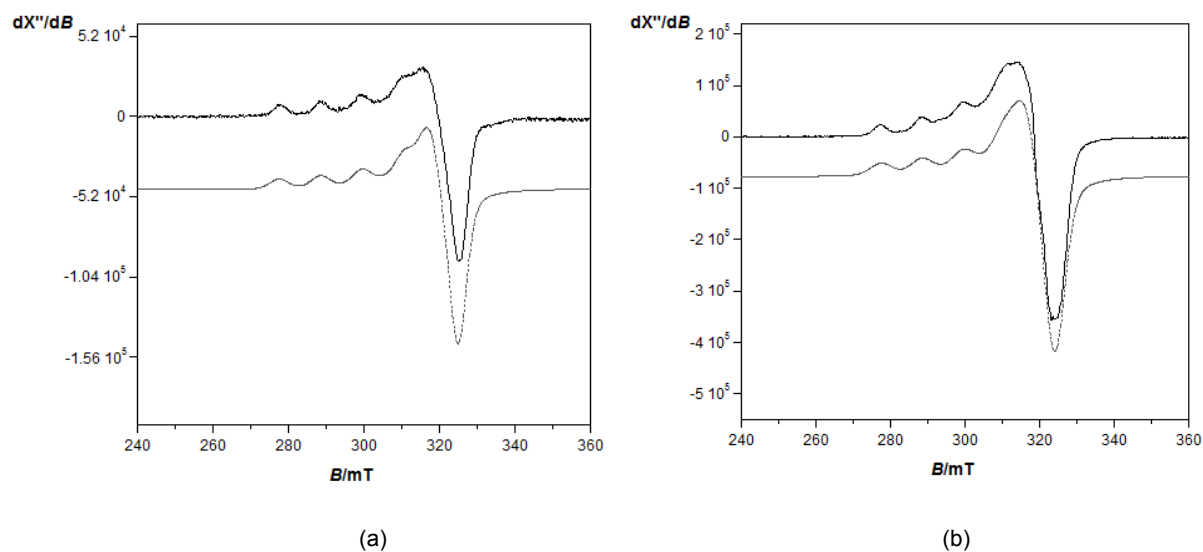

**Figure S4:** (a) RPE spectrum of the small crystals obtained for the last trial of synthesis of  $[\text{Cu}(\text{I})(\text{dpdipy})_2]^-$ , recorded in benzonitrile at 100 K. Micro-wave frequency = 9.33 GHz, power = 20 mW, amplitude of modulation 0.2 mT, modulation frequency = 100 KHz. (b) RPE spectrum of  $[\text{Cu}(\text{II})(\text{dpdipy})_2]$  recorded in the same experimental conditions Dotted line: simulated spectrum.

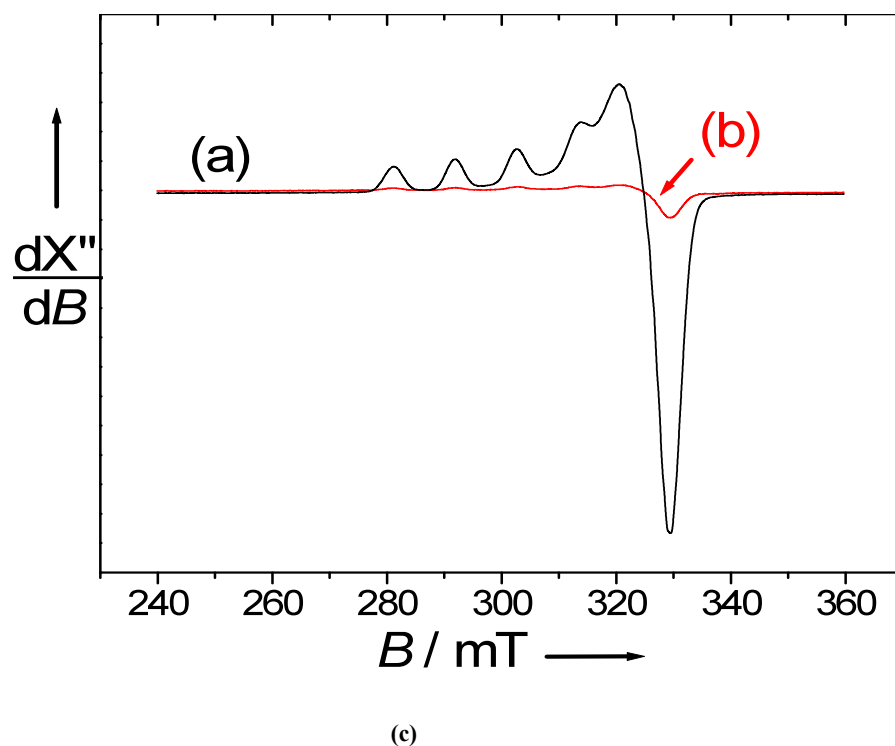

**Figure S4c:** EPR spectra of  $[\text{Cu}^{\text{II}}(\text{dpdipy})_2]$  in 1 mM benzonitrile solution (+0.1 M  $\text{TBAPF}_6$ ): (a) Before electrolysis; (b) After electrolysis at -0.59 V/SCE in the glove box. Microwave Freq: 9.34 GHz, power: 5 mW, Mod. Amp: 0.4 mT, Freq: 100 KHz,  $T = 100$  K.

## Electrochemical data

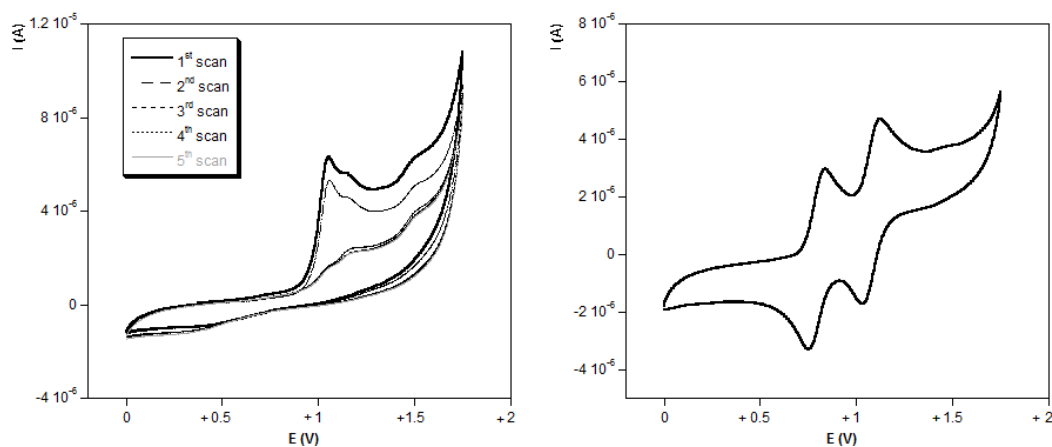

**Figure S5:** Oxidation voltammograms of  $[\text{Cu}(\text{II})(\text{dipy})_2]$  (left) and  $[\text{Cu}(\text{II})(\text{dpdipy})_2]$  (right) in PhCN.

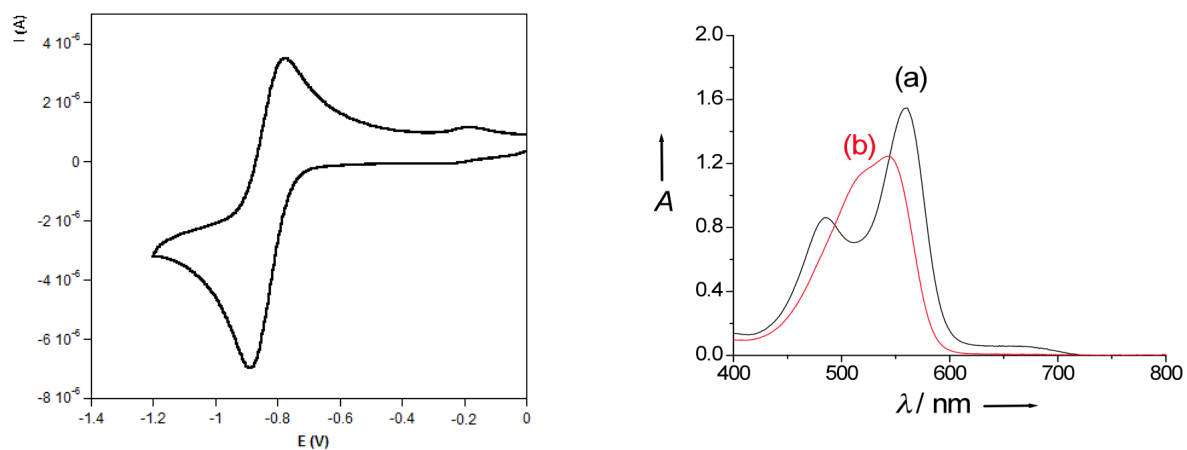

**Figure S6:** (Left, a) Reduction voltammogram of  $[\text{Cu}(\text{II})(\text{dipy})_2]$  in PhCN. (Right, b) Absorption spectra of  $[\text{Cu}^{\text{II}}(\text{dpdpipy})_2]$  0.02 mM in benzonitrile solution (+0.1 M TBAPF<sub>6</sub>).  $T = 298 \text{ K}$ ,  $l = 1.000 \text{ cm}$ . (a) Before electrolysis; (b) After electrolysis at -0.59 V/SCE in the glove box.

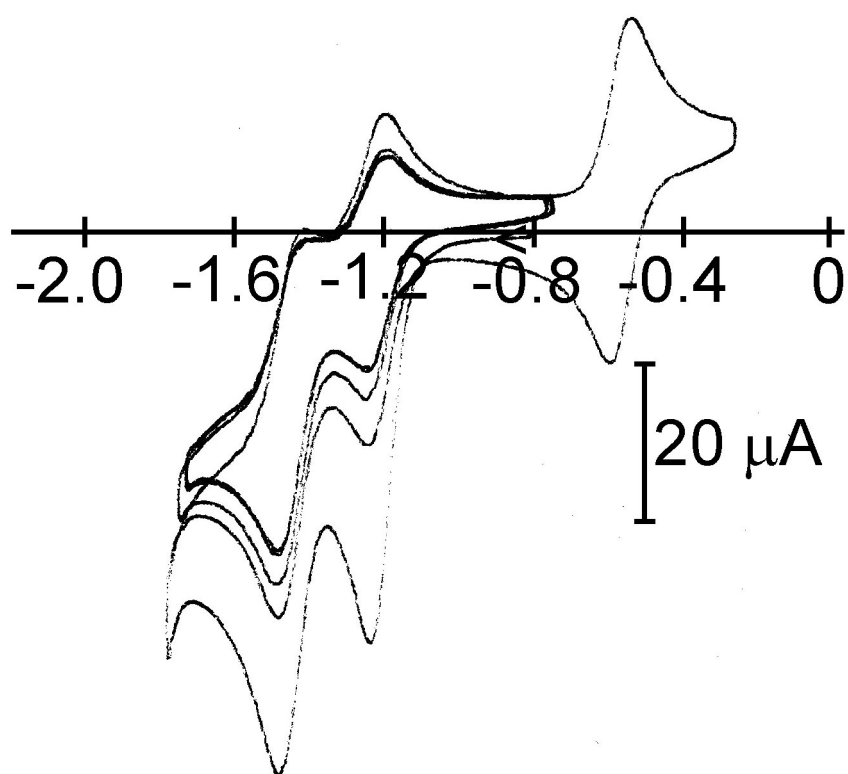

**Figure S7:** CV curve of  $[\text{Cu}^{\text{II}}(\text{dpdiPy})_2]$  after one-electron electrochemical reduction in 1 mM benzonitrile solution (+0.1 M TBAPF<sub>6</sub>) at a platinum disc, recorded in the glove box. Scan rate = 0.1 V / s; T = 298 K. The potential values are converted against the SCE electrode.

## Spectroscopy: Absorption, emission.

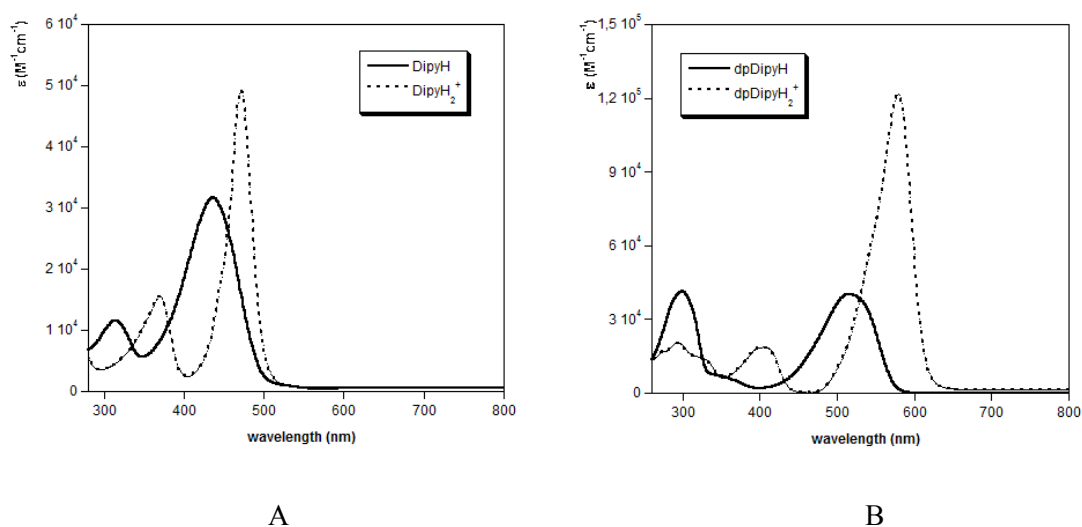

**Figure S8:** UV/Vis absorption spectra for (A) dipyH (solid line - TEA) and dipyH<sub>2</sub><sup>+</sup> (dotted line – TFA) ; (B) dpdipyH (solid line - TEA) and dpdipyH<sub>2</sub><sup>+</sup> (dotted line – TFA) recorded in CHCl<sub>3</sub>.

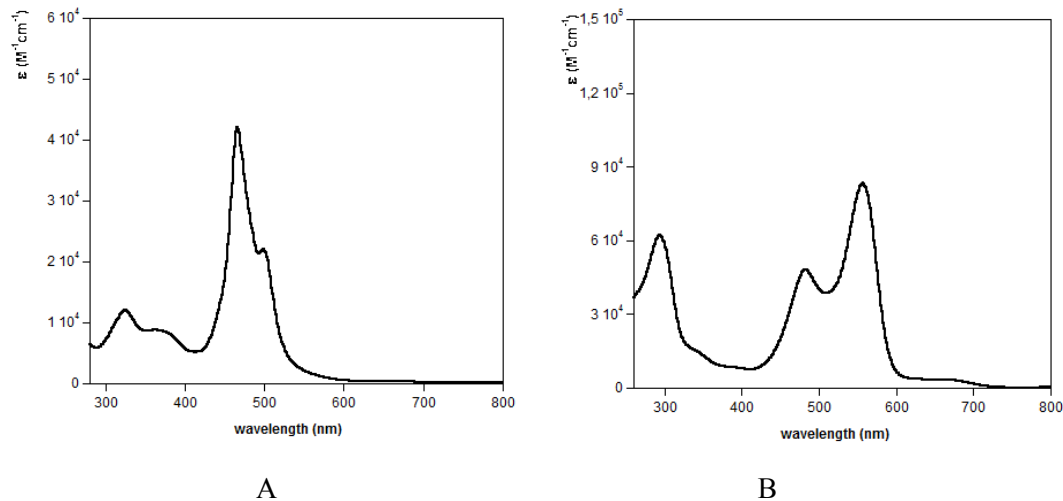

**Figure S9.** UV/Vis absorption spectra for (A) [Cu(II)(dipy)<sub>2</sub>] and (B) [Cu(II)(dpdipy)<sub>2</sub>] recorded in CHCl<sub>3</sub>.

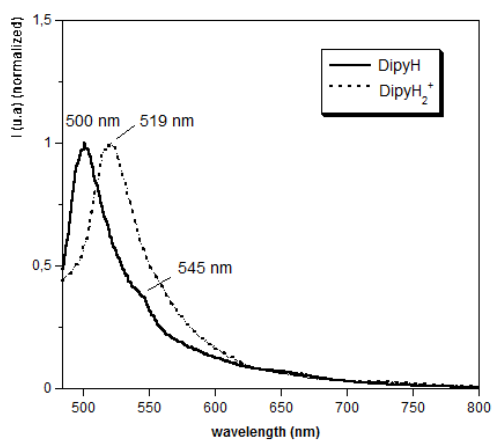

**Figure S10:** Emission spectra of dipyH (non protonated,  $2.7 \cdot 10^{-6}$  M) and dipyH<sub>2</sub><sup>+</sup> (protonated,  $2.8 \cdot 10^{-6}$  M) in CHCl<sub>3</sub>.  $\lambda_{\text{excitation}} = 465$  nm.

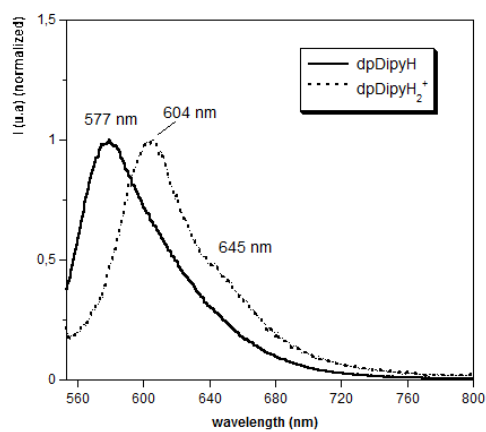

**Figure S11:** Emission spectra of dpdipyH (non protonated,  $3.5 \cdot 10^{-6}$  M) and dpdipyH<sub>2</sub><sup>+</sup> (protonated,  $1.4 \cdot 10^{-6}$  M) in CHCl<sub>3</sub>.  $\lambda_{\text{excitation}} = 530$  nm.



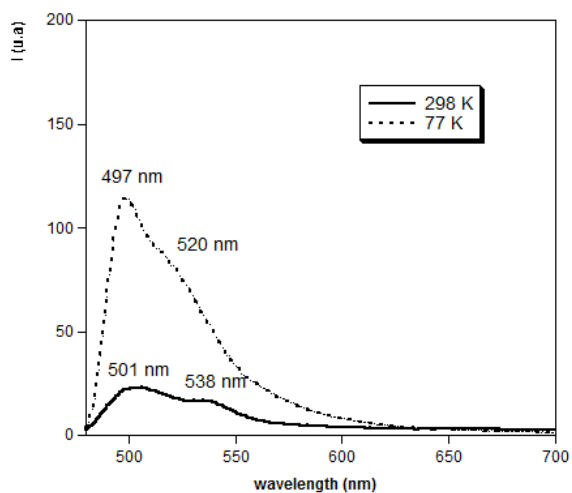

**Figure S12:** Emission spectra of [Cu(II)(dipy)<sub>2</sub>] at 298K and 77K in the mixture EtOH/MeOH (4/1)(4.7 10<sup>-6</sup> M).

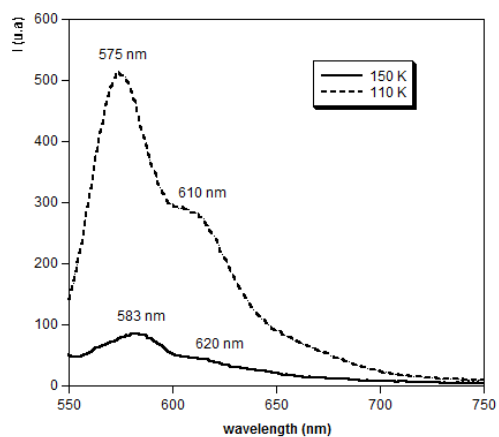

**Figure S13:** Emission spectra of [Cu(II)(dpdipy)<sub>2</sub>] at 150K and 110K in butyronitrile (2.5 10<sup>-6</sup>M).  $\lambda_{\text{excitation}} = 540 \text{ nm}$ .

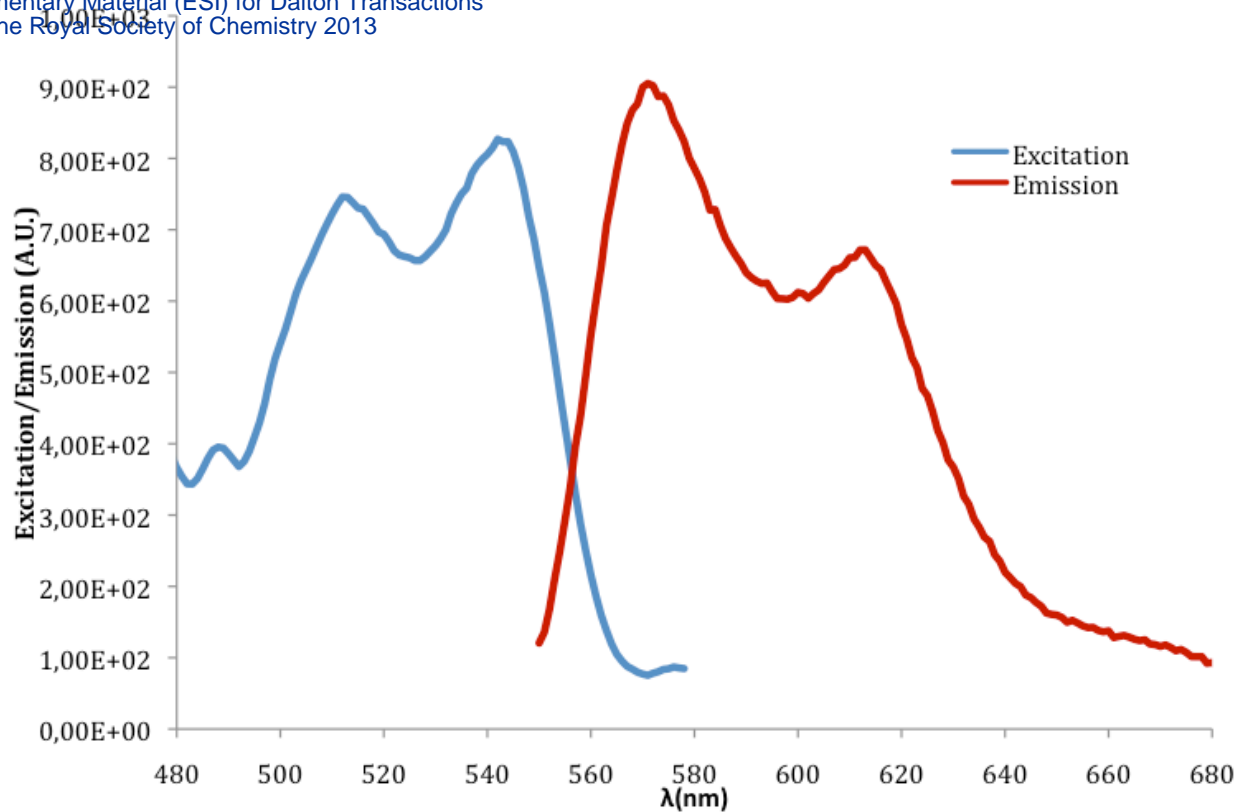

**Figure S14:** Excitation spectrum in blue and emission spectrum in red of Cu(dpdiy)<sub>2</sub> at 80K in EtOH/MeOH 4/1.

**Figure S15 :** The different calculated orbitals.

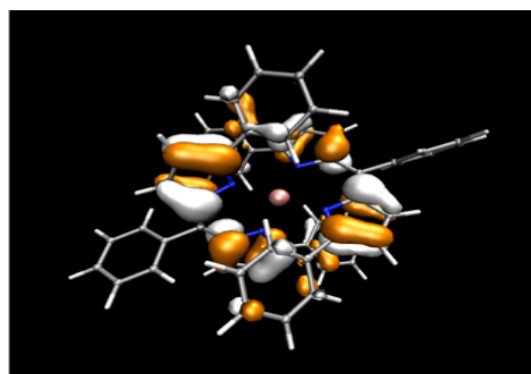

HOMO

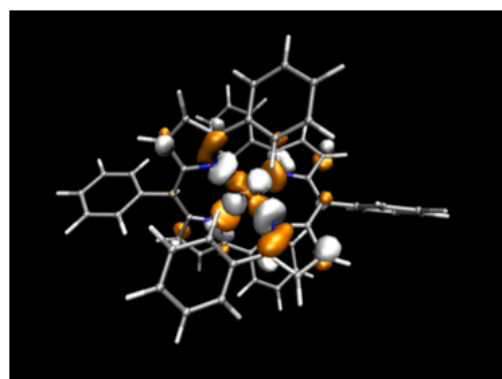

LUMO

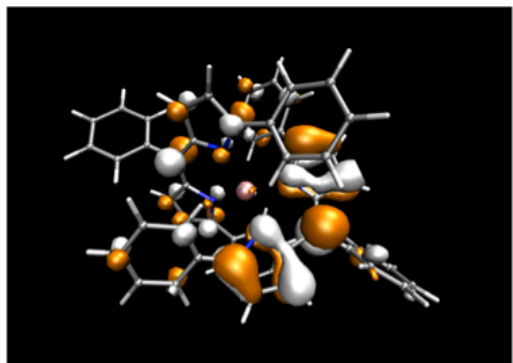

LUMO+1

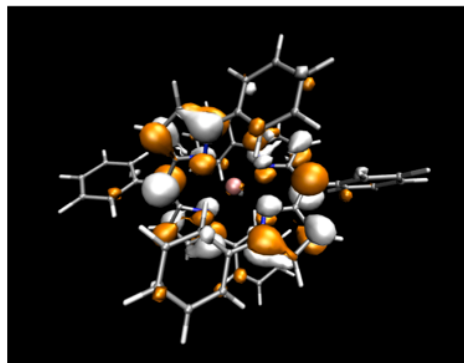

LUMO+2

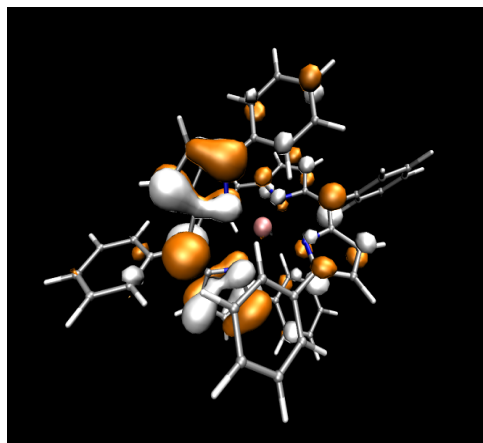

LUMO+3

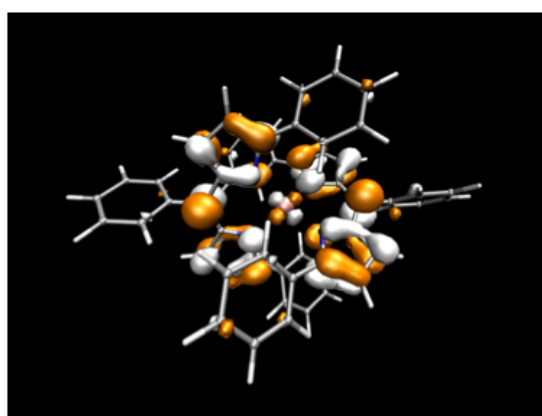

LUMO+4

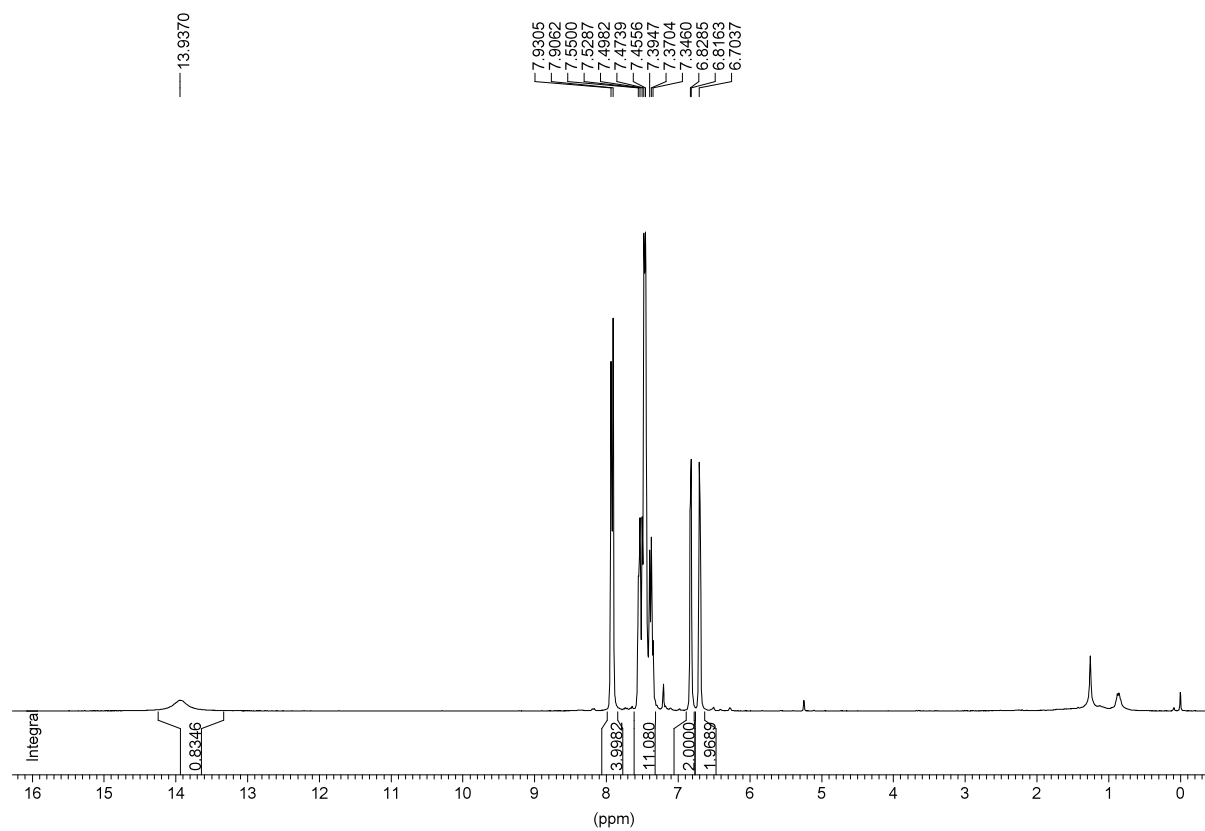

**Figure S16:**  $^1\text{H}$ -NMR of dpdipyH ( $\text{CDCl}_3$ , 300 MHz,  $25^\circ\text{C}$ )

## Supplementary Information

### Tables

**Table S1:** XR data for the three samples

|                                                | Cu(II)(dipy) <sub>2</sub>                         | Cu(II)(dpdipy) <sub>2</sub>                       | Cu(II)(dpdipy) <sub>2</sub><br>from the synthesis of<br>big crystals of Cu(I) |
|------------------------------------------------|---------------------------------------------------|---------------------------------------------------|-------------------------------------------------------------------------------|
| formula                                        | C <sub>30</sub> H <sub>22</sub> Cu N <sub>4</sub> | C <sub>54</sub> H <sub>38</sub> Cu N <sub>4</sub> | C <sub>54</sub> H <sub>38</sub> Cu N <sub>4</sub>                             |
| <i>M</i> (g mol <sup>-1</sup> )                | 502.06                                            | 806.42                                            | 806.42                                                                        |
| crystal dimensions<br>(mm <sup>3</sup> )       | 0.5 x 0.2 x 0.1                                   | 0.4 x 0.3 x 0.2                                   | 0.4 x 0.4 x 0.3                                                               |
| crystal system                                 | monoclinic                                        | monoclinic                                        | monoclinic                                                                    |
| space group                                    | P2 <sub>1</sub> /c                                | P2 <sub>1</sub> /n                                | P2 <sub>1</sub> /c                                                            |
| <i>a</i> (Å)                                   | 17.0388(7)                                        | 13.7700(4)                                        | 18.9299(5)                                                                    |
| <i>b</i> (Å)                                   | 15.6229(7)                                        | 13.5622(4)                                        | 10.5052(3)                                                                    |
| <i>c</i> (Å)                                   | 19.7025(7)                                        | 21.6416(6)                                        | 21.7918(6)                                                                    |
| <i>α</i> (deg)                                 | 90.00                                             | 90.00                                             | 90.00                                                                         |
| <i>β</i> (deg)                                 | 115.496(2)                                        | 94.943(2)                                         | 113.925(2)                                                                    |
| <i>γ</i> (deg)                                 | 90.00                                             | 90.00                                             | 90.00                                                                         |
| <i>V</i> (Å <sup>3</sup> )                     | 4734.0(3)                                         | 4026.6(2)                                         | 3961.2(2)                                                                     |
| <i>Z</i>                                       | 4                                                 | 4                                                 | 4                                                                             |
| <i>D</i> <sub>calc</sub> (g cm <sup>-3</sup> ) | 1.409                                             | 1.330                                             | 1.325                                                                         |
| <i>θ</i> <sub>max</sub> (deg)                  | 71.30                                             | 71.48                                             | 70.93                                                                         |
| <i>λ</i> (Å)                                   | 1.54178 (CuKα)                                    | 1.54178 (CuKα)                                    | 1.54178 (CuKα)                                                                |
| <i>F</i> (000)                                 | 2072                                              | 1676                                              | 1676                                                                          |
| <i>T</i> (K)                                   | 100(2)                                            | 100(2)                                            | 100(2)                                                                        |
| measured reflections                           | 47610                                             | 39793                                             | 39036                                                                         |
| unique reflections                             | 9195                                              | 7712                                              | 7546                                                                          |

|                                                  |                     |                     |                     |
|--------------------------------------------------|---------------------|---------------------|---------------------|
| observed reflections<br>( $I_o > 2\sigma(I_o)$ ) | 6864                | 6382                | 6992                |
| parameters refined                               | 632                 | 532                 | 532                 |
| $R_1$                                            | 0.0468              | 0.0412              | 0.0335              |
| $\omega R_2^{a,b,c}$                             | 0.1094 <sup>a</sup> | 0.0988 <sup>b</sup> | 0.0878 <sup>c</sup> |
| $R_1$ (all data)                                 | 0.0686              | 0.0524              | 0.0361              |
| $\omega R_2$ (all data)                          | 0.1229              | 0.1059              | 0.0901              |
| GOOF                                             | 1.068               | 1.058               | 1.033               |
| $\mu$ (mm <sup>-1</sup> )                        | 1.500               | 1.097               | 1.115               |

<sup>a</sup> Weighting scheme as defined for Cu(II)(Dipy)<sub>2</sub>:  $\omega = 1 / [\sigma^2(F_o^2) + (0.0608 P)^2 + 1.6118 P]$ ,  $P = (F_o^2 + 2F_c^2) / 3$

<sup>b</sup> Weighting scheme as defined for Cu(II)(dpDipy)<sub>2</sub>:  $\omega = 1 / [\sigma^2(F_o^2) + (0.0530 P)^2 + 1.8201 P]$ ,  $P = (F_o^2 + 2F_c^2) / 3$

<sup>c</sup> Weighting scheme as defined for Cu(II)(dpDipy)<sub>2</sub>:  $\omega = 1 / [\sigma^2(F_o^2) + (0.0460 P)^2 + 2.1928 P]$ ,  $P = (F_o^2 + 2F_c^2) / 3$

**Table S2:** Selected bond lengths [Å] and angles [°] for [Cu(II)(dipy)<sub>2</sub>] and [Cu(II)(dpdipy)<sub>2</sub>]

| [Cu(II)(dipy) <sub>2</sub> ] |          | [Cu(II)(dpdipy) <sub>2</sub> ]/[Cu(II)(dpdipy) <sub>2</sub> ] from the synthesis of big crystals of Cu(I) complex |                         |
|------------------------------|----------|-------------------------------------------------------------------------------------------------------------------|-------------------------|
| Cu1 - N2                     | 1.950(5) | Cu1 - N2                                                                                                          | 1.9582(16) / 1.9552(12) |
| Cu1 - N12                    | 1.919(6) | Cu1 - N12                                                                                                         | 1.9690(16) / 1.9759(12) |
| Cu1 - N19                    | 1.973(5) | Cu1 - N31                                                                                                         | 1.9524(16) / 1.9630(12) |
| Cu1 - N29                    | 1.920(5) | Cu1 - N41                                                                                                         | 1.9711(16) / 1.9759(12) |
| N2 - Cu1 - N12               | 92.0(2)  | N2 - Cu1 - N12                                                                                                    | 95.38(7) / 95.30(5)     |
| N12 - Cu1 - N29              | 96.8(2)  | N12 - Cu1 - N41                                                                                                   | 105.81(7) / 107.20(5)   |
| N29 - Cu1 - N19              | 92.0(2)  | N41 - Cu1 - N31                                                                                                   | 94.76(7) / 95.76(5)     |

|                  |           |                |                     |
|------------------|-----------|----------------|---------------------|
| N19 - Cu1 - N2   | 97.2(2)   | N31 - Cu1 - N2 | 98.16(7) / 97.86(5) |
| Cu36 - N37       | 1.964(6)  |                |                     |
| Cu36 - N47       | 1.926(6)  |                |                     |
| Cu36 - N54       | 1.979(5)  |                |                     |
| Cu36 - N64       | 1.912(6)  |                |                     |
| N37 - Cu36 - N47 | 91.85(16) |                |                     |
| N47 - Cu36 - N64 | 96.5(2)   |                |                     |
| N64 - Cu36 - N54 | 92.35(16) |                |                     |
| N54 - Cu36 - N37 | 97.6(2)   |                |                     |

**Table S3:** Values of different angles

**Cu(II)(dipy)<sub>2</sub>**

Dihedral angle between N2Cu1N12 and N19Cu1N29 (complex of the bottom) 45.791°

Dihedral angle between N37Cu36N47 and N54Cu36N64 (complex of the top) 46.167°

*Complex of the bottom*

angle between planes pyrrole N2 and pyrrole N12 1.096°

angle between planes pyrrole N19 and pyrrole N29 4.650°

*Complex of the top*

angle between planes pyrrole N37 and pyrrole N47 1.712°

angle between planes pyrrole N54 and pyrrole N64 8.820°

**Table S4:** Values of different angles

| <b>Cu(II)(dpdipy)<sub>2</sub></b>                |         | <b>Big crystals from Cu(I) synthesis</b> |
|--------------------------------------------------|---------|------------------------------------------|
| Dihedral angle between N2Cu1N12 and N31Cu1N41    | 63.043° | 64.891°                                  |
| angle between planes pyrrole N2 and pyrrole N12  | 18.137° | 21.642°                                  |
| angle between planes pyrrole N31 and pyrrole N41 | 14.804° | 14.320°                                  |
| angle between planes C13-C18 and pyrrole N2      | 29.513° | 30.932°                                  |
| angle between planes C25-C30 and pyrrole N12     | 27.872° | 26.788°                                  |
| angle between planes C42-C47 and pyrrole N31     | 36.058° | 27.792°                                  |
| angle between planes C54-C59 and pyrrole N41     | 34.569° | 33.232°                                  |

|                                | $\lambda_{\text{detection}}$ | <b>Butyronitrile</b>        |                             | <b>Toluene</b>              |                             |
|--------------------------------|------------------------------|-----------------------------|-----------------------------|-----------------------------|-----------------------------|
|                                |                              | $\tau$ (295 K) <sup>a</sup> | $\tau$ (110 K) <sup>b</sup> | $\tau$ (295 K) <sup>b</sup> | $\tau$ (185 K) <sup>b</sup> |
| [Cu(II)(Dipy) <sub>2</sub> ]   | 500 nm                       | ≤ 1 ns                      | ≤ 10 ns                     | ≤ 10 ns                     | ≤ 10 ns                     |
| [Cu(II)(dpDipy) <sub>2</sub> ] | 595 nm                       | ~1 ns                       | ≤ 10 ns                     | ≤ 10 ns                     | ≤ 10 ns                     |

**Table S5:** Luminescence lifetimes ( $\tau$ ) of excited [Cu(II)(dipy)<sub>2</sub>] and [Cu(II)(dpdipy)<sub>2</sub>]. <sup>a</sup> Measurements performed by TCSPC with a pulsed diode laser as excitation source (measurable lifetimes ≥ 1 ns,  $\lambda_{\text{excitation}} = 439$  nm). <sup>b</sup> Measurements with the Continuum pulsed laser (measurable lifetimes ≥ 10 ns,  $\lambda_{\text{excitation}} = 480$  nm).



| [Cu(II)(dpdipy) <sub>2</sub> ] |        |
|--------------------------------|--------|
| Cu1 – N2                       | 2.002  |
| Cu1 – N12                      | 2.009  |
| Cu1 – N31                      | 2.005  |
| Cu1 – N41                      | 2.009  |
| N2 – Cu1 – N12                 | 94.79  |
| N2 – Cu1 – N31                 | 103.34 |
| N2 – Cu1 – N41                 | 131.91 |
| N12 – Cu1 – N31                | 131.36 |
| N12 – Cu1 – N41                | 106.17 |
| N31 – Cu1 – N41                | 94.45  |

**Table S6:** Selected bond lengths (Å) and angles (°) of [Cu(II)(dpdipy)<sub>2</sub>] optimized in gas phase at DFT/B3LYP level with the basis 6-31G\* (for the atoms C, N and H) and the Stuttgart pseudopotential (for the Cu atom). The calculated bond length distances Cu-N and angles are consistent with the experimental values. The mean absolute errors are 0.044 Å and 1.61° for the bond length and angle respectively, while the largest discrepancy is 0.053 Å and 5.18°, respectively.

**Table S7:** Cartesian Coordinates (in Å) of the equilibrium geometry of [Cu(II)(dpdipy)<sub>2</sub>].

| Atom | X            | Y          | Z            |
|------|--------------|------------|--------------|
| C    | -8.65440657  | 9.25350399 | -16.82092470 |
| C    | -10.03811025 | 9.22057177 | -16.48390301 |
| C    | -10.12312413 | 8.77919788 | -15.18328648 |
| C    | -8.78895927  | 8.52008783 | -14.73999684 |
| C    | -8.42294172  | 8.07940654 | -13.45380732 |

|   |              |             |              |
|---|--------------|-------------|--------------|
| C | -7.11849203  | 7.83814048  | -12.98239333 |
| C | -6.76866275  | 7.37423147  | -11.67686292 |
| C | -5.39791581  | 7.24389867  | -11.64818561 |
| C | -4.92114990  | 7.60201837  | -12.94112861 |
| C | -8.13890254  | 9.76096473  | -18.10137833 |
| C | -8.86387371  | 9.50598685  | -19.28073157 |
| C | -8.44831177  | 10.02701979 | -20.50347434 |
| C | -7.30028369  | 10.81923342 | -20.57450170 |
| C | -6.57428985  | 11.08393684 | -19.41205652 |
| C | -6.98901976  | 10.56441174 | -18.18688110 |
| C | -9.53798080  | 7.84158833  | -12.48122370 |
| C | -10.45005165 | 6.79459641  | -12.68209715 |
| C | -11.48138286 | 6.56705243  | -11.77001390 |
| C | -11.61950526 | 7.38628291  | -10.64794916 |
| C | -10.71968770 | 8.43389096  | -10.44238961 |
| C | -9.68416783  | 8.65926488  | -11.35027667 |
| C | -3.51654122  | 7.48451259  | -13.36122619 |
| C | -3.15422148  | 6.95957822  | -14.61374142 |
| C | -1.81296214  | 6.77643627  | -14.94678813 |
| C | -0.80608759  | 7.11139196  | -14.03988960 |
| C | -1.15251988  | 7.63206420  | -12.79089080 |
| C | -2.49183739  | 7.81188825  | -12.45382874 |
| C | -5.85525204  | 6.92241416  | -18.10642650 |
| C | -5.16953171  | 6.80184235  | -19.34880578 |
| C | -4.11687888  | 7.68891846  | -19.31324648 |
| C | -4.17073478  | 8.35399915  | -18.04943789 |
| C | -3.26822862  | 9.33591741  | -17.59464580 |
| C | -3.37854171  | 10.08927179 | -16.40899228 |
| C | -2.41064676  | 11.00729827 | -15.89786148 |

|    |              |             |              |
|----|--------------|-------------|--------------|
| C  | -2.93222114  | 11.54217859 | -14.73977036 |
| C  | -4.21402221  | 10.95303559 | -14.55358525 |
| C  | -6.98944542  | 6.08033626  | -17.69978009 |
| C  | -7.91645400  | 5.65448167  | -18.66967537 |
| C  | -8.96563936  | 4.80314710  | -18.33184219 |
| C  | -9.10918081  | 4.35437166  | -17.01680484 |
| C  | -8.19447614  | 4.76530837  | -16.04487707 |
| C  | -7.14412040  | 5.61765434  | -16.38133511 |
| C  | -2.07319878  | 9.60848325  | -18.45446048 |
| C  | -1.12935204  | 8.60112934  | -18.71050106 |
| C  | 0.18769910   | 10.12621695 | -20.04948342 |
| C  | -0.00669001  | 8.85931024  | -19.49685733 |
| C  | -0.74767063  | 11.13404701 | -19.80899450 |
| C  | -1.86613950  | 10.87910446 | -19.01512781 |
| C  | -5.15797657  | 11.32416712 | -13.49080748 |
| C  | -6.53984791  | 11.41988987 | -13.72804007 |
| C  | -7.40825951  | 11.83942786 | -12.72159867 |
| C  | -6.91512458  | 12.17461707 | -11.45871364 |
| C  | -5.54252413  | 12.08917872 | -11.21109843 |
| C  | -4.67351327  | 11.67202595 | -12.21624027 |
| Cu | -5.91017549  | 8.67194532  | -15.61060527 |
| H  | -10.84570904 | 9.54961823  | -17.12396135 |
| H  | -11.01697916 | 8.66846098  | -14.58673113 |
| H  | -7.46376678  | 7.14773938  | -10.88148127 |
| H  | -4.78715795  | 6.87518788  | -10.83463386 |
| H  | -9.74854344  | 8.87757804  | -19.23243663 |
| H  | -5.68348576  | 11.70492635 | -19.45583871 |
| H  | -6.42622367  | 10.79881606 | -17.28918474 |
| H  | -10.33941055 | 6.15722802  | -13.55474154 |

|   |              |             |              |
|---|--------------|-------------|--------------|
| H | -12.17610339 | 5.74765891  | -11.93583939 |
| H | -12.42327441 | 7.20899709  | -9.93804608  |
| H | -6.97517782  | 11.22688652 | -21.52786664 |
| H | -10.82345329 | 9.07847566  | -9.57332901  |
| H | -8.98290859  | 9.47390820  | -11.19296917 |
| H | -3.92557597  | 6.67292438  | -15.32066504 |
| H | -1.55695723  | 6.35700486  | -15.91630596 |
| H | 0.23863814   | 6.96455596  | -14.30126221 |
| H | -0.37822764  | 7.89829047  | -12.07606166 |
| H | -2.75574138  | 8.22220285  | -11.48338045 |
| H | -5.41631504  | 6.10468286  | -20.13814119 |
| H | -3.37794858  | 7.85998935  | -20.08300414 |
| H | -1.45667208  | 11.23315114 | -16.35176744 |
| H | -2.49242998  | 12.30244095 | -14.10815293 |
| H | -7.81872285  | 6.01522183  | -19.68950419 |
| H | -9.67309366  | 4.49043259  | -19.09580751 |
| H | -9.92521850  | 3.68666962  | -16.75373692 |
| H | -8.28852042  | 4.41179874  | -15.02118971 |
| H | -6.42838228  | 5.91109348  | -15.62014266 |
| H | -1.27629485  | 7.61572729  | -18.27882001 |
| H | 1.06151885   | 10.32650904 | -20.66377158 |
| H | 0.71745137   | 8.06905158  | -19.67645733 |
| H | -0.60773607  | 12.12176927 | -20.23981981 |
| H | -2.59094466  | 11.66590712 | -18.82856579 |
| H | -6.93320359  | 11.18072934 | -14.71022575 |
| H | -8.47214048  | 11.91219741 | -12.93074596 |
| H | -7.59312593  | 12.50366124 | -10.67540665 |
| H | -9.02042080  | 9.81234922  | -21.40250485 |
| H | -5.14861039  | 12.34668288 | -10.23161614 |

|   |             |             |              |
|---|-------------|-------------|--------------|
| H | -3.60912091 | 11.59180664 | -12.01419169 |
| N | -7.90589924 | 8.82713819  | -15.77729253 |
| N | -5.95307064 | 7.96654668  | -13.73742557 |
| N | -5.26580536 | 7.86514156  | -17.33417701 |
| N | -4.47320510 | 10.06898092 | -15.54592643 |
